# Supplementary material for: Functional FGFR4 Gly388Arg polymorphism contributes to cancer susceptibility: Evidence from meta-analysis
Source: PubMed Central journal article supplement (PMC5421931; doi:10.18632/oncotarget.15811), 2017-02-28
Supplement: oncotarget-08-25300-s001.pdf [file oncotarget-08-25300-s001.pdf]

# Functional *FGFR4* Gly388Arg polymorphism contributes to cancer susceptibility: Evidence from meta-analysis

## SUPPLEMENTRY FIGURE

A. homozygous model

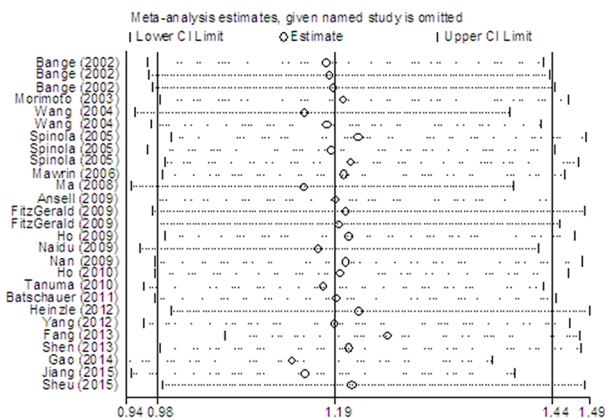

B. Heterozygous model

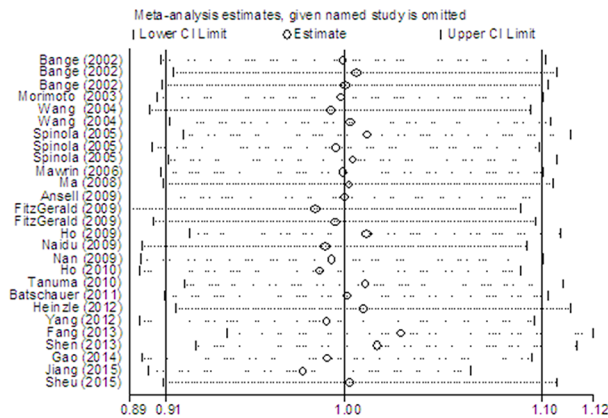

C. Dominant model

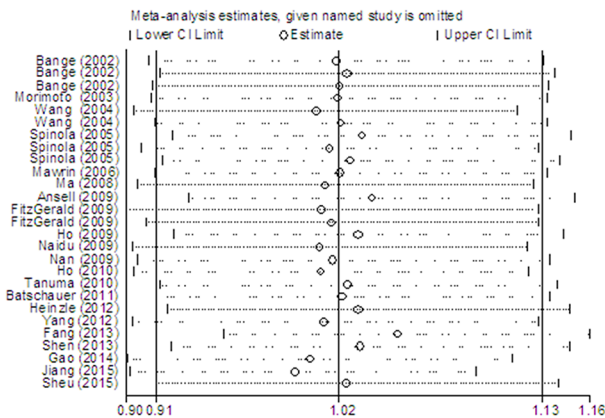

D. Recessive model

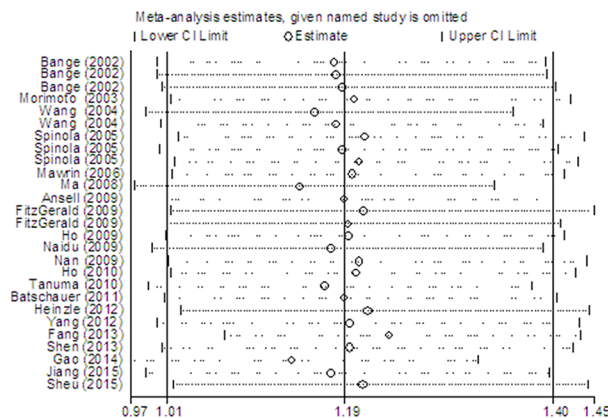

**Supplementary Figure 1: Sensitivity analyses of potential publication bias of *FGFR4* rs351855 G>A polymorphism. (A) homozygous model; (B) heterozygous model; (C) dominant model; (D) recessive model.**
